# Supplementary material
Source: PubMed Central journal article supplement (PMC10479784)
Supplement: NIHMS1922615-supplement-cb-2022-005653_SI.pdf [file NIHMS1922615-supplement-cb-2022-005653_SI.pdf]

## SUPPORTING INFORMATION

### **A Novel Regioselective Approach to Cyclize Phage-Displayed Peptides in Combination with Epitope-Directed Selection to Identify a Potent Neutralizing macrocyclic Peptide for SARS-CoV-2**

J. Trae Hampton<sup>a,†</sup>, Tyler J. Lalonde<sup>a,†</sup>, Jeffery M. Tharp<sup>a,†,‡</sup>, Yadagiri Kurra<sup>a</sup>, Yugendar R. Alugubelli<sup>a</sup>, Christopher M. Roundy<sup>b</sup>, Gabriel L. Hamer<sup>b</sup>, Shiqing Xu<sup>a</sup>, and Wenshe Ray Liu<sup>a,c,d,e,\*</sup>

<sup>a</sup>Texas A&M Drug Discovery Laboratory, Department of Chemistry, Texas A&M University, College Station, TX 77843, USA

<sup>b</sup>Department of Entomology, Texas A&M University, College Station, TX 77843, USA

<sup>c</sup>Institute of Biosciences and Technology and Department of Translational Medical Sciences, College of Medicine, Texas A&M University, Houston, TX 77030, USA

<sup>d</sup>Department of Biochemistry and Biophysics, Texas A&M University, College Station, TX 77843, USA

<sup>e</sup>Department of Molecular and Cellular Medicine, College of Medicine, Texas A&M University, College Station, TX 77843, USA

<sup>†</sup>Contributed equally to the paper.

<sup>‡</sup>Current address: Department of Molecular Biophysics and Biochemistry, Yale University, New Haven, CT 06511, USA

\*Correspondence should be addressed to Wenshe Ray Liu: [wslu2007@tamu.edu](mailto:wslu2007@tamu.edu)

## SUPPLEMENTARY FIGURES

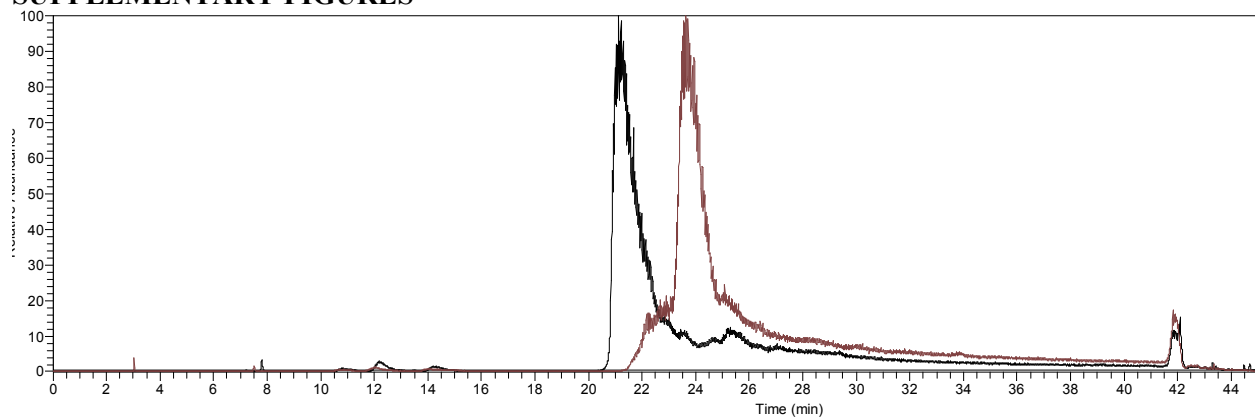

**Figure S1:** TIC chromatogram for ESI-MS of CA<sub>5</sub>C-sfGFP before (black) and after (maroon) reaction with 100 μM of CAMcBT for 3 hours at room temperature.

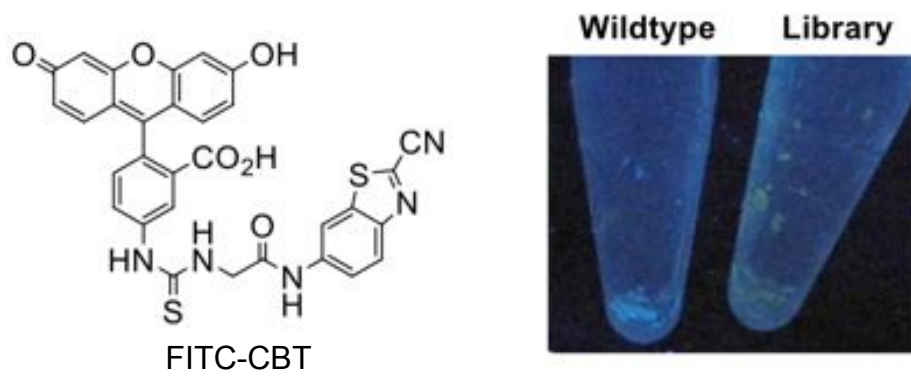

**Figure S2:** Labelling phages with FITC-CBT. Only the 5mer Library (CX<sub>5</sub>C) containing an N-terminal cysteine showed fluorescence when reacted with FITC-CBT.

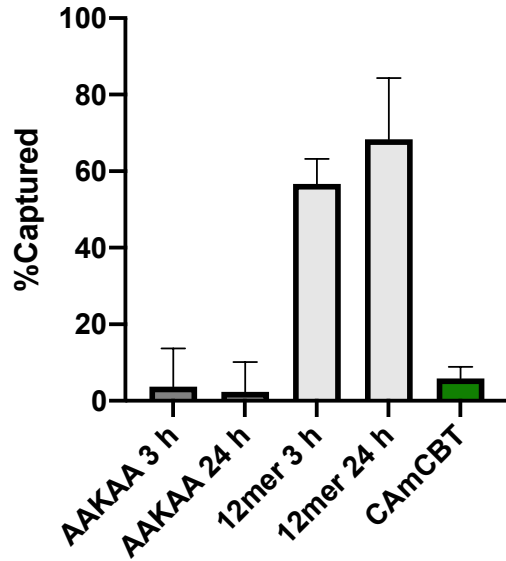

**Figure S3:** Biotin Capture Assay using Biotin-CBT. Phages were reacted with Biotin-CBT for varying amounts of time (3 or 24 hours) and then captured using streptavidin-coated beads. Phages cyclized with CAmCBT were reacted for 24 hours with Biotin-CBT before capture. AAKAA refers to phages that do not display a library on the N-terminus of pIII. Data is given as the mean  $\pm$  s.d. of three independent experiments. %Captured was calculated by  $(\text{phages input} - \text{phages eluted}) / \text{phages input} \times 100$ .

**A**

p28\_12mer\_R3top100

|              | V1 | V2 | V3 | V4  | V5 | V6 | V7  | V8 | V9  | V10 | V11 | V12 | V13 | V14 | n      | percent           |
|--------------|----|----|----|-----|----|----|-----|----|-----|-----|-----|-----|-----|-----|--------|-------------------|
| <b>P28S1</b> | C  | V  | P  | E   | T  | E  | L   | D  | T   | TAG | S   | G   | P   | C   | 194735 | 47.4536331935404  |
|              | C  | V  | P  | E   | S  | A  | R   | S  | D   | D   | D   | G   | E   | C   | 25557  | 6.22780960550139  |
| <b>P28S2</b> | C  | I  | P  | E   | Q  | V  | L   | R  | A   | D   | G   | S   | S   | C   | 22047  | 5.37248183951517  |
| <b>P28S3</b> | C  | V  | P  | S   | G  | A  | D   | P  | TAG | I   | A   | S   | L   | C   | 16700  | 4.0695081743504   |
|              | C  | V  | P  | V   | E  | V  | R   | G  | P   | G   | P   | T   | A   | C   | 14834  | 3.61479546456969  |
|              | C  | I  | P  | E   | E  | E  | L   | T  | A   | TAG | D   | S   | L   | C   | 9615   | 2.34301323930414  |
|              | C  | V  | P  | D   | S  | V  | TAG | V  | N   | S   | N   | V   | Q   | C   | 7676   | 1.87051166145591  |
|              | C  | V  | D  | P   | F  | V  | Y   | G  | G   | D   | E   | TAG | N   | C   | 2676   | 0.652096040392915 |
|              | C  | S  | G  | D   | G  | I  | V   | L  | S   | S   | M   | G   | R   | C   | 2071   | 0.504667750244292 |
|              | C  | Q  | I  | V   | W  | D  | H   | P  | TAG | N   | S   | T   | L   | C   | 1884   | 0.459099006016536 |
|              | C  | I  | P  | P   | E  | A  | N   | G  | L   | TAG | G   | W   | R   | C   | 1636   | 0.398665591211812 |
|              | C  | I  | P  | TAG | A  | A  | D   | P  | N   | S   | W   | D   | L   | C   | 1503   | 0.366255735691536 |
|              | C  | V  | P  | E   | A  | V  | R   | G  | D   | V   | G   | S   | S   | C   | 1331   | 0.324342238326969 |
|              | C  | V  | P  | E   | S  | E  | L   | N  | S   | L   | P   | R   | P   | C   | 901    | 0.219558494915552 |

**B**

p28\_12mer\_R3enriched

|              | V1 | V2 | V3 | V4  | V5  | V6 | V7  | V8 | V9  | V10 | V11 | V12 | V13 | V14 | n      | enrichment       |
|--------------|----|----|----|-----|-----|----|-----|----|-----|-----|-----|-----|-----|-----|--------|------------------|
| <b>P28S1</b> | C  | S  | G  | D   | G   | I  | V   | L  | S   | S   | M   | G   | R   | C   | 2071   | 1070.66953766001 |
|              | C  | V  | P  | E   | T   | E  | L   | D  | T   | TAG | S   | G   | P   | C   | 194735 | 586.571439597557 |
|              | C  | I  | P  | TAG | A   | A  | D   | P  | N   | S   | W   | D   | L   | C   | 1503   | 387.874774288506 |
| <b>P28S2</b> | C  | I  | P  | E   | Q   | V  | L   | R  | A   | D   | G   | S   | S   | C   | 22047  | 373.05068109633  |
|              | C  | V  | P  | V   | E   | V  | R   | G  | P   | G   | P   | T   | A   | C   | 14834  | 273.145442533775 |
| <b>P28S3</b> | C  | V  | P  | T   | I   | V  | TAG | G  | D   | S   | S   | G   | D   | C   | 252    | 259.802243834208 |
|              | C  | V  | P  | S   | G   | A  | D   | P  | TAG | I   | A   | S   | L   | C   | 16700  | 256.960049279274 |
|              | C  | V  | P  | E   | A   | V  | R   | G  | D   | V   | G   | S   | S   | C   | 1331   | 228.581869406965 |
|              | C  | V  | P  | D   | S   | V  | TAG | V  | N   | S   | N   | V   | Q   | C   | 7676   | 219.669976154253 |
|              | C  | F  | R  | TAG | L   | C  | TAG | L  | Y   | M   | A   | L   | S   | C   | 551    | 189.082058667524 |
|              | C  | V  | P  | E   | T   | E  | L   | D  | T   | L   | S   | G   | P   | C   | 843    | 173.489120279553 |
|              | C  | V  | P  | L   | S   | V  | TAG | A  | Q   | G   | Y   | T   | A   | C   | 162    | 166.658585321991 |
|              | C  | V  | P  | E   | TAG | V  | I   | S  | E   | D   | T   | T   | S   | C   | 476    | 163.208820191909 |
|              | C  | V  | P  | E   | S   | I  | Q   | E  | G   | R   | Q   | TAG | M   | C   | 143    | 146.994924080523 |

**Figure S4:** Next-generation sequencing data for the selection against P28. Sequences were sorted by abundance (A) and enrichment between rounds 1 and 3 of selection (B). Enrichment was calculated by the  $(\%R3 - \%R1) / \%R1$ .

**A**

## p29\_12mer\_R3top100

|              | V1 | V2 | V3 | V4  | V5  | V6  | V7 | V8 | V9 | V10 | V11 | V12 | V13 | V14 | n      | percent           |
|--------------|----|----|----|-----|-----|-----|----|----|----|-----|-----|-----|-----|-----|--------|-------------------|
| <b>P29S1</b> | C  | V  | P  | E   | S   | A   | R  | S  | D  | D   | D   | G   | E   | C   | 179599 | 62.1916802581869  |
| <b>P29S2</b> | C  | V  | P  | E   | T   | I   | I  | G  | N  | TAG | G   | V   | P   | C   | 8050   | 2.78756020956912  |
|              | C  | N  | Y  | S   | A   | TAG | P  | I  | P  | C   | V   | L   | M   | C   | 2722   | 0.942576259682876 |
| <b>P29S3</b> | C  | T  | F  | N   | G   | W   | G  | S  | G  | S   | R   | TAG | A   | C   | 2311   | 0.800254862647732 |
|              | C  | S  | G  | I   | S   | D   | C  | L  | F  | V   | T   | A   | R   | C   | 1683   | 0.582790538224203 |
|              | C  | L  | F  | L   | S   | I   | A  | I  | V  | S   | T   | P   | S   | C   | 1314   | 0.455012933586811 |
|              | C  | Y  | S  | H   | R   | F   | S  | R  | N  | TAG | G   | K   | M   | C   | 689    | 0.238587451477407 |
|              | C  | F  | R  | L   | F   | R   | F  | Y  | T  | G   | G   | E   | D   | C   | 525    | 0.181797404971899 |
|              | C  | V  | P  | E   | S   | V   | R  | S  | D  | D   | D   | G   | E   | C   | 489    | 0.169331297202398 |
|              | C  | P  | K  | G   | L   | L   | N  | P  | Y  | F   | H   | N   | Q   | C   | 425    | 0.147169327834395 |
|              | C  | F  | K  | S   | R   | TAG | G  | V  | G  | R   | R   | G   | V   | C   | 369    | 0.127777604637392 |
|              | C  | Y  | I  | TAG | V   | G   | D  | N  | G  | H   | TAG | F   | N   | C   | 363    | 0.125699920009142 |
|              | C  | V  | V  | TAG | R   | S   | V  | A  | G  | L   | TAG | S   | Y   | C   | 359    | 0.124314796923642 |
|              | C  | H  | L  | R   | TAG | N   | C  | R  | W  | R   | W   | I   | V   | C   | 316    | 0.109424723754515 |

**B**

## p29\_12mer\_R3enriched

|              | V1 | V2 | V3 | V4  | V5 | V6  | V7 | V8 | V9 | V10 | V11 | V12 | V13 | V14 | n      | enrichment       |
|--------------|----|----|----|-----|----|-----|----|----|----|-----|-----|-----|-----|-----|--------|------------------|
| <b>P29S1</b> | C  | V  | P  | E   | S  | A   | R  | S  | D  | D   | D   | G   | E   | C   | 179599 | 750.542033291433 |
|              | C  | V  | P  | E   | S  | V   | R  | S  | D  | D   | D   | G   | E   | C   | 489    | 278.312821391841 |
| <b>P29S2</b> | C  | V  | P  | E   | T  | I   | I  | G  | N  | TAG | G   | V   | P   | C   | 8050   | 247.545648837044 |
|              | C  | V  | S  | E   | S  | A   | R  | S  | D  | D   | D   | G   | E   | C   | 215    | 244.612501428408 |
|              | C  | N  | Y  | S   | A  | TAG | P  | I  | P  | C   | V   | L   | M   | C   | 2722   | 171.753805914245 |
|              | C  | V  | P  | G   | S  | A   | R  | S  | D  | D   | D   | G   | E   | C   | 106    | 120.092675122843 |
| <b>P29S3</b> | C  | T  | F  | N   | G  | W   | G  | S  | G  | S   | R   | TAG | A   | C   | 2311   | 104.60195177694  |
|              | C  | V  | P  | E   | S  | A   | R  | S  | D  | D   | D   | G   | G   | C   | 47     | 52.6920351959776 |
|              | C  | I  | P  | E   | S  | A   | R  | S  | D  | D   | D   | G   | E   | C   | 35     | 38.9834304650897 |
|              | Y  | V  | P  | E   | S  | A   | R  | S  | D  | D   | D   | G   | E   | C   | 32     | 35.5562792823677 |
|              | C  | F  | P  | E   | S  | A   | R  | S  | D  | D   | D   | G   | E   | C   | 27     | 29.8443606444978 |
|              | C  | L  | F  | L   | S  | I   | A  | I  | V  | S   | T   | P   | S   | C   | 1314   | 24.0182036338704 |
|              | C  | V  | P  | E   | T  | I   | I  | G  | S  | TAG | G   | V   | P   | C   | 17     | 18.4205233687579 |
|              | C  | G  | S  | TAG | F  | G   | V  | V  | V  | V   | Y   | C   | V   | C   | 291    | 17.4685369291129 |

**Figure S5:** Next-generation sequencing data for the selection against P29. Sequences were sorted by abundance (A) and enrichment between rounds 1 and 3 of selection (B). Enrichment was calculated by the  $(\%R3 - \%R1) / \%R1$ .

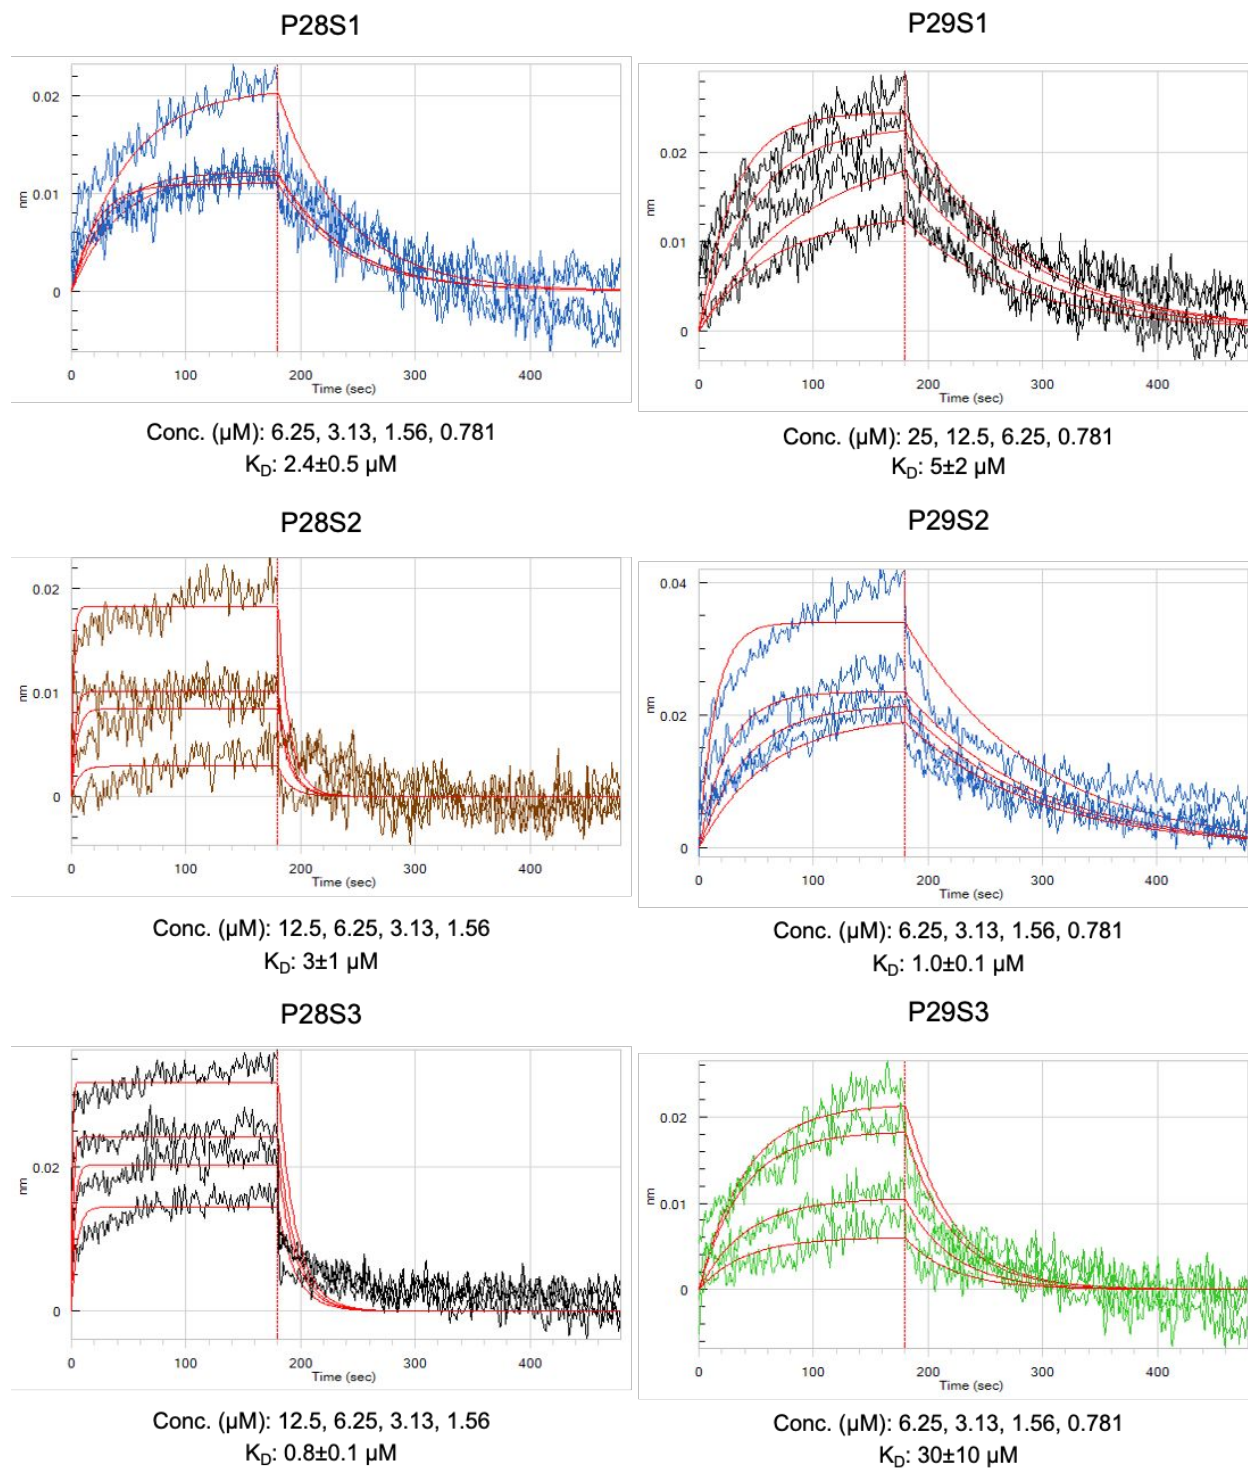

**Figure S6:** Biolayer interferometry (BLI) traces of the selected peptides against P28 and P29. Concentrations tested are listed below the traces for the corresponding peptides, along with  $K_D$  values given as the mean  $\pm$  s.d. of 3 independent experiments ( $n=3$ ).

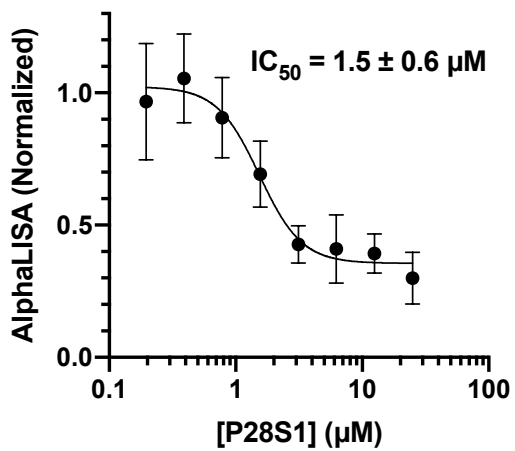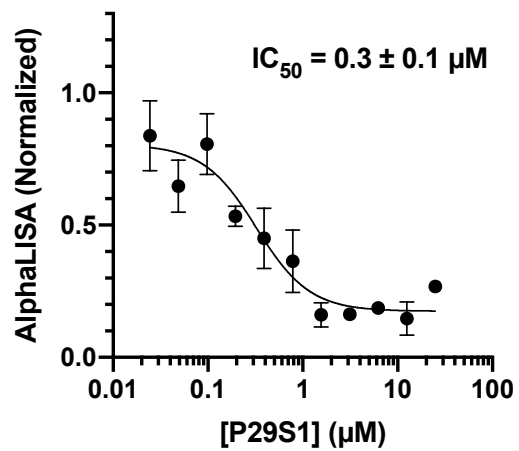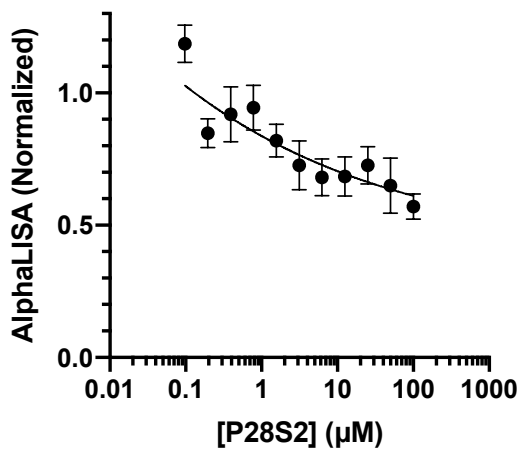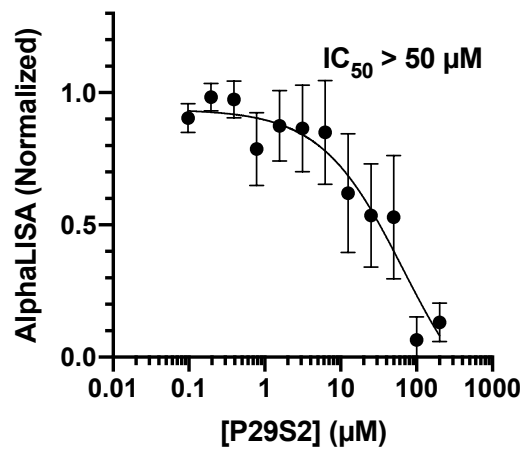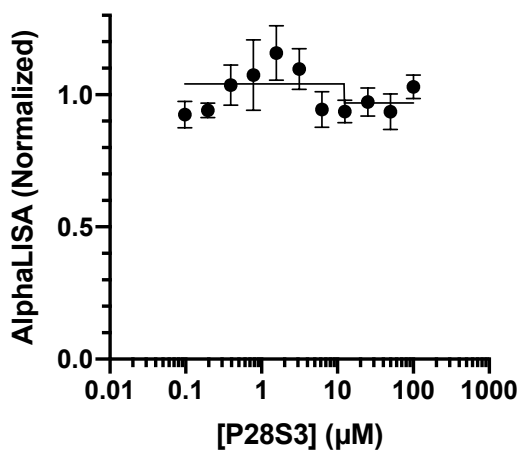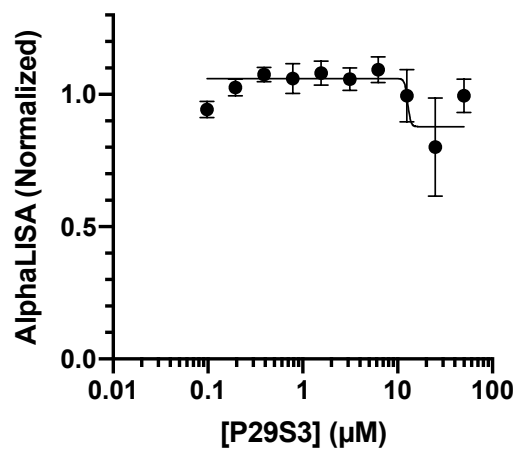

Figure S7: AlphaScreen data for the P28 and P29 selected peptides. Data points and  $\text{IC}_{50}$  values are given as the mean  $\pm$  s.d. of three biologically independent experiments ( $n = 3$ ).



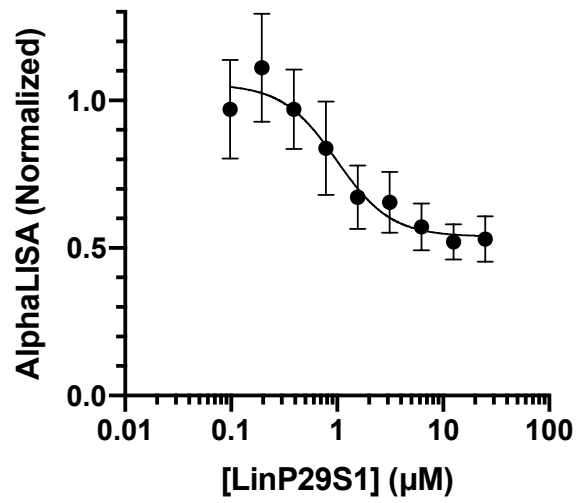

**Figure S8:** AlphaScreen data for the inhibition of the Spike:ACE2 interaction with LinP29S1. Data points are given as the mean  $\pm$  sem of three biologically independent experiments (n = 3).

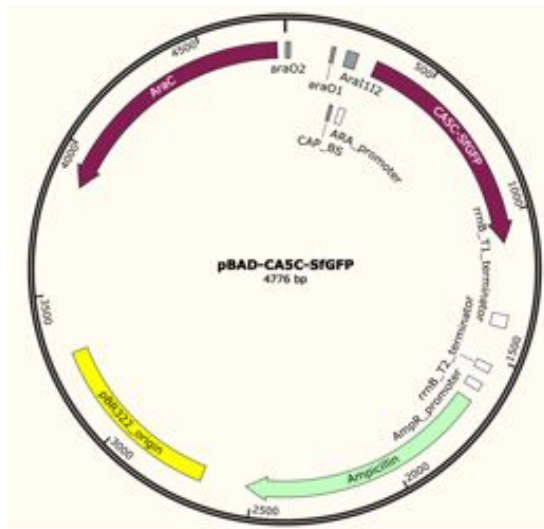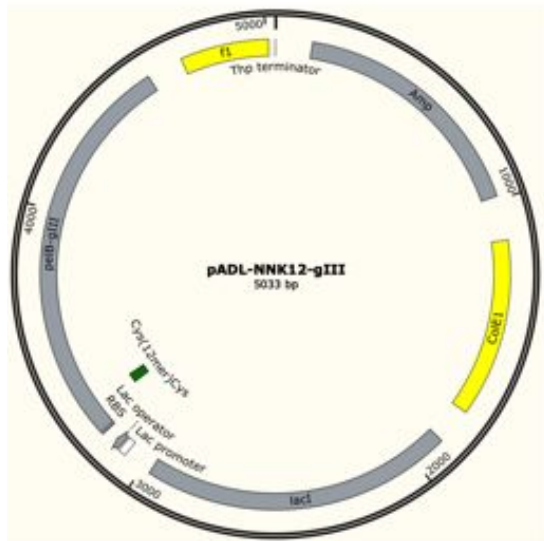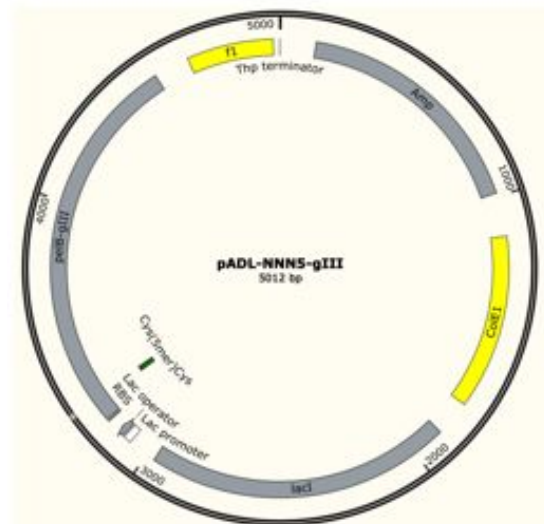

**Figure S9:** Plasmid constructs for the expression of CA<sub>5</sub>C-sfGFP and for the expression of phage libraries.

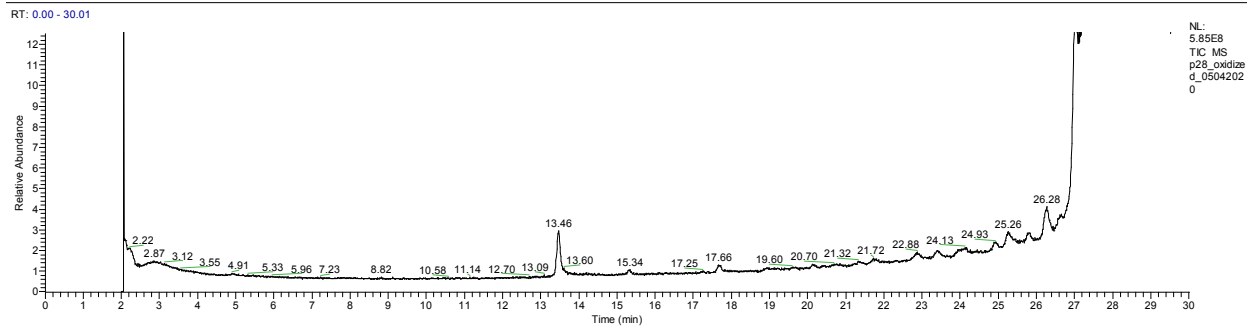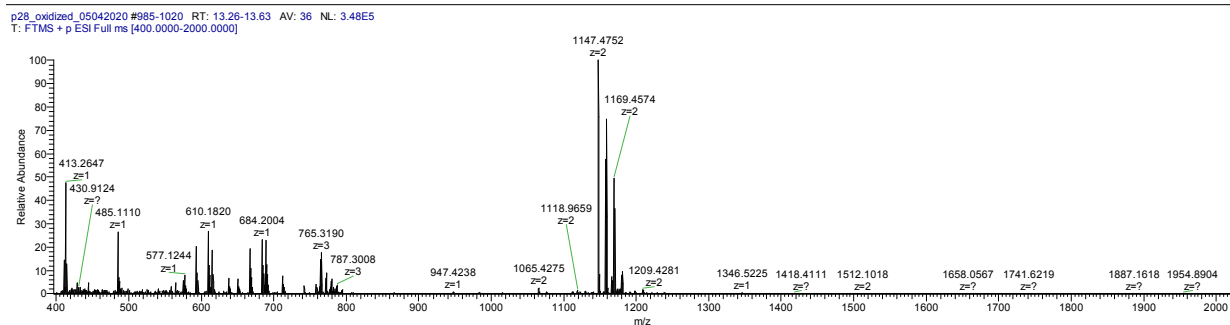

**Figure S10:** LC-MS data for P28. The TIC is shown on top and extracted data for the isolated peak on bottom.

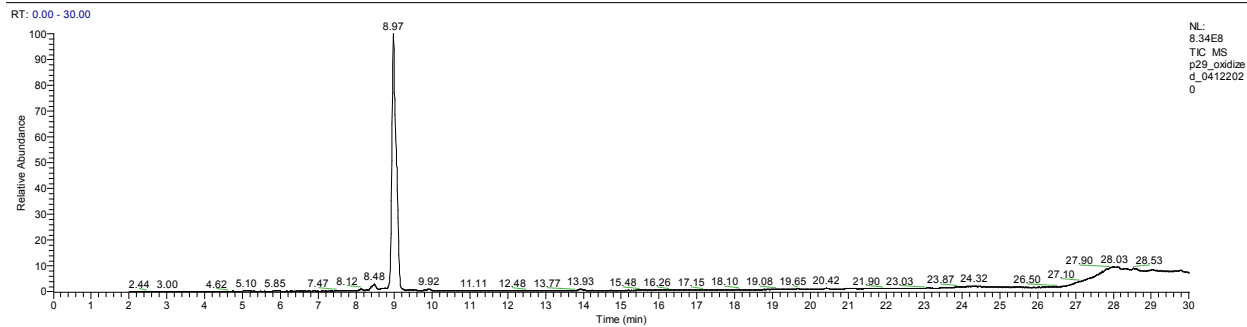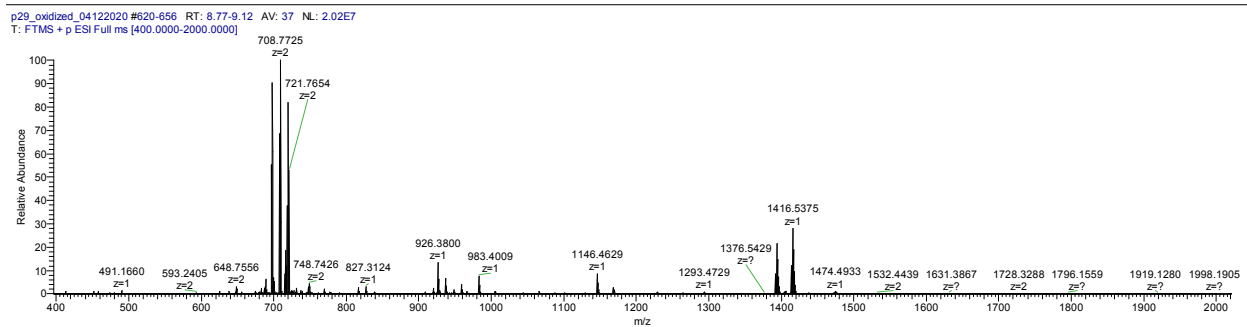

**Figure S11:** LC-MS data for P29. The TIC is shown on top and extracted data for the isolated peak on bottom.

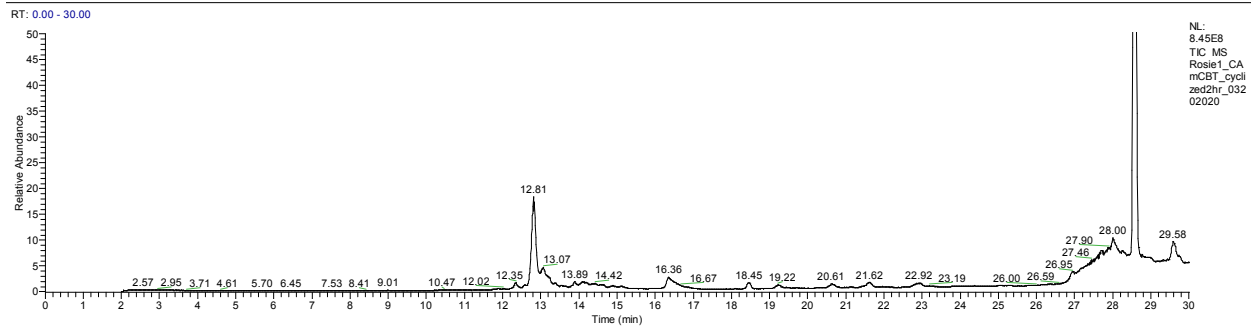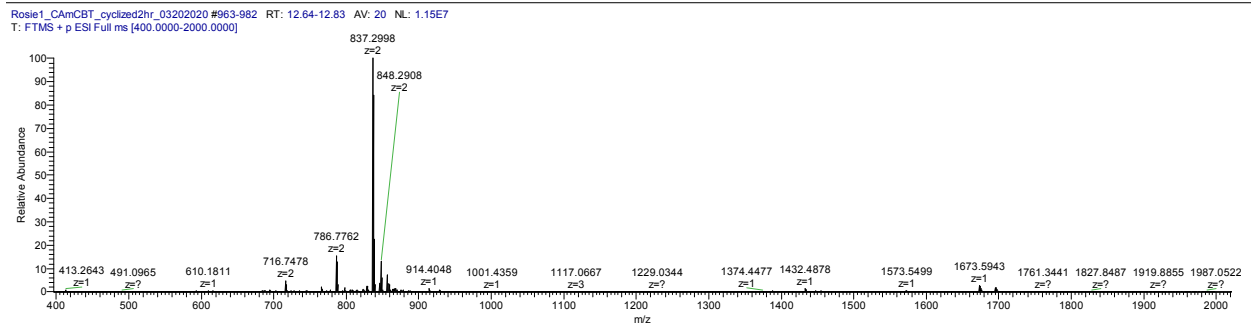

**Figure S12:** LC-MS data for P28S1. The TIC is shown on top and extracted data for the isolated peak on bottom.

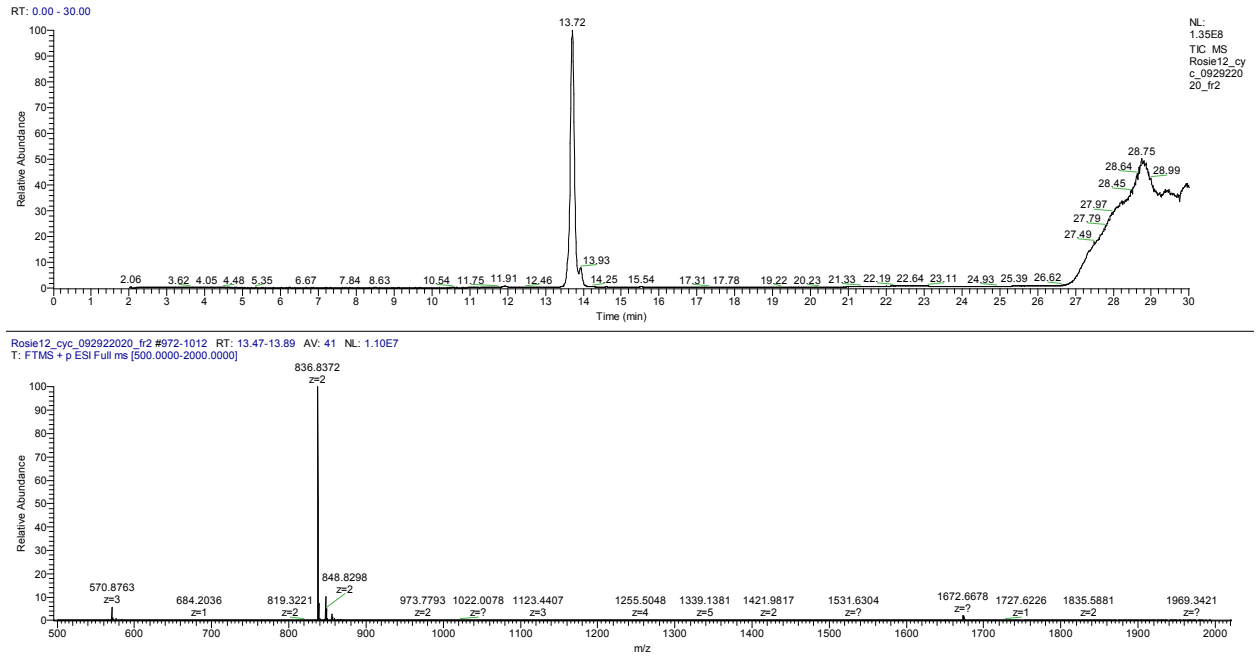

Figure S13: LC-MS data for P28S2. The TIC is shown on top and extracted data for the isolated peak on bottom.

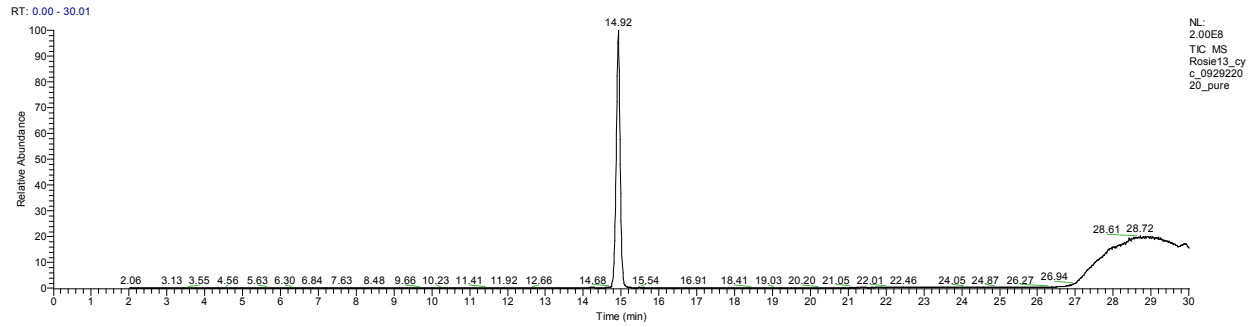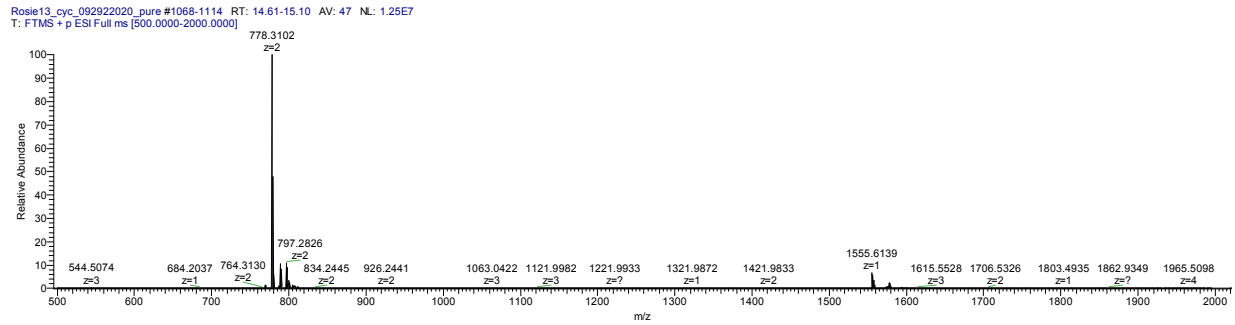

**Figure S14:** LC-MS data for P28S3. The TIC is shown on top and extracted data for the isolated peak on bottom.

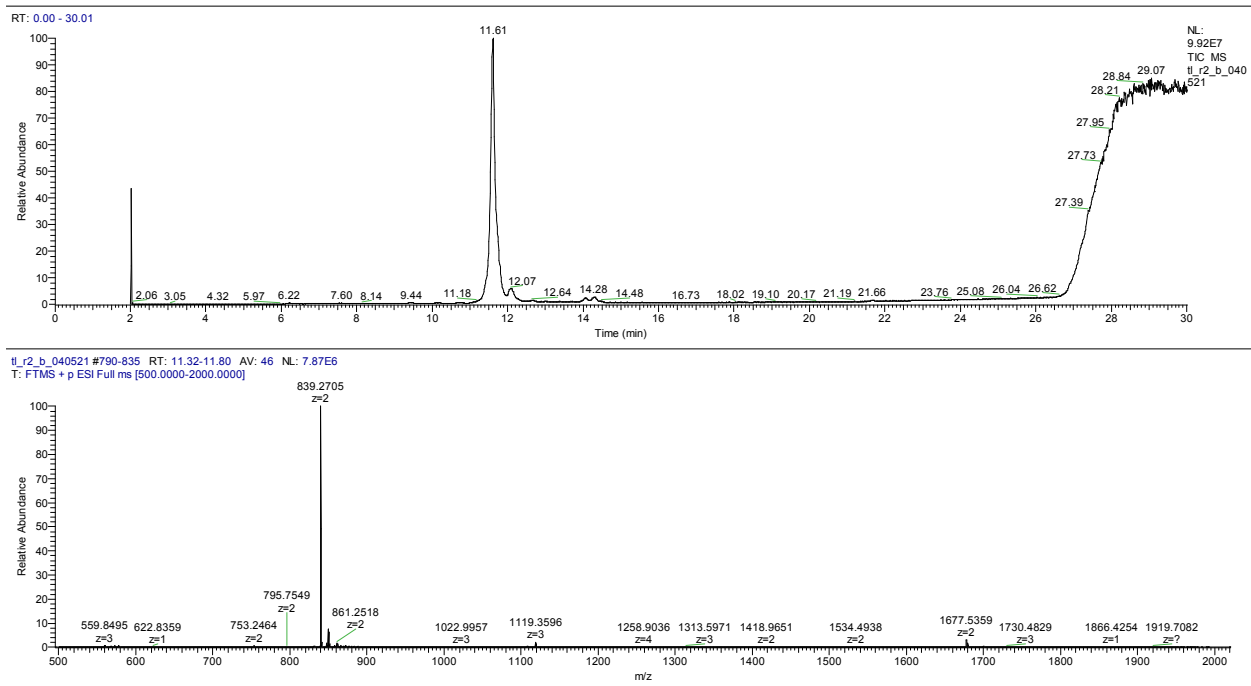

**Figure S15:** LC-MS data for P29S1. The TIC is shown on top and extracted data for the isolated peak on bottom.



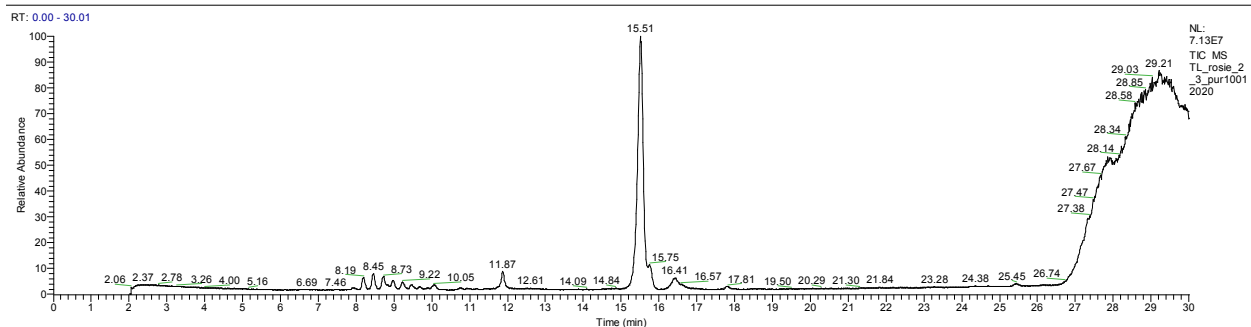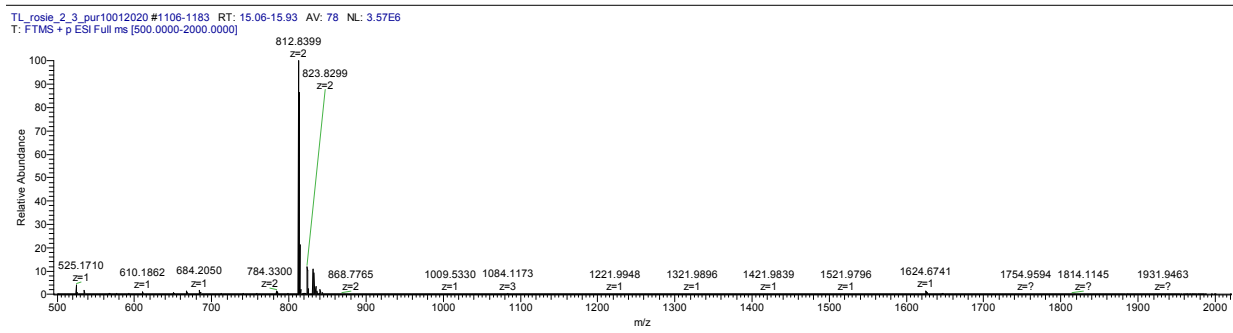

Figure S16: LC-MS data for P29S2. The TIC is shown on top and extracted data for the isolated peak on bottom.

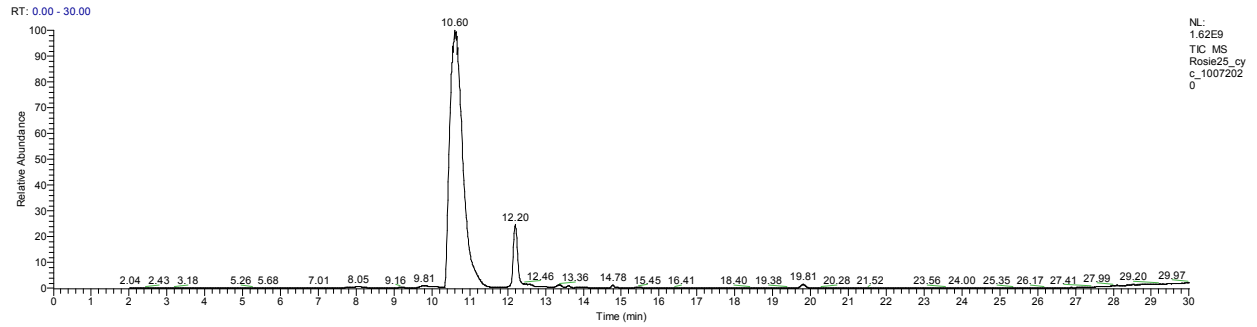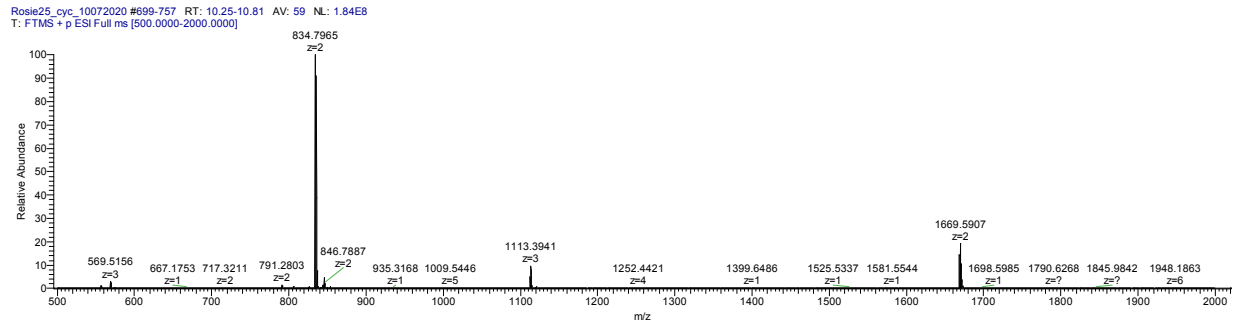

Figure S17: LC-MS data for P29S3. The TIC is shown on top and extracted data for the isolated peak on bottom.

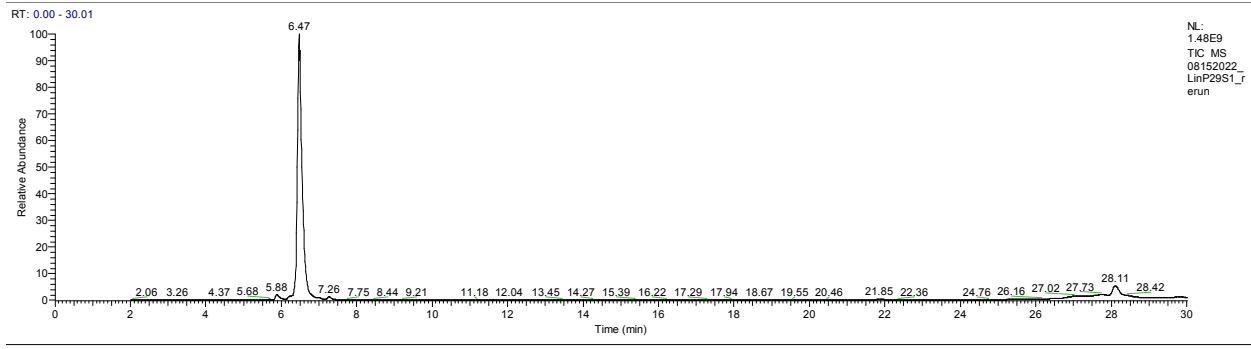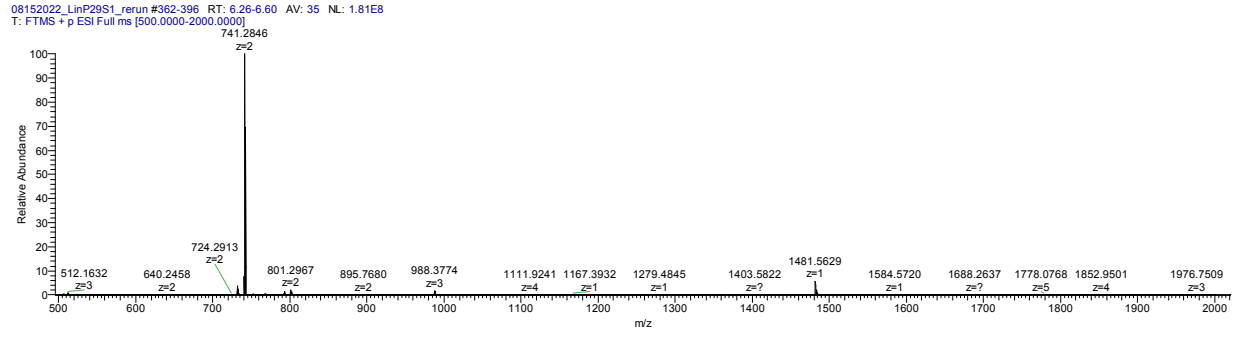

**Figure S18:** LC-MS Data for LinP29S1. The TIC is shown on top and extracted data for the isolated peak on bottom.

220505-165620-CBT #65-73 RT: 0.29-0.32 AV: 9 SB: 19 0.08-0.16 NL: 2.84E7  
T: FTMS + p ESI Full ms [150.0000-1000.0000]

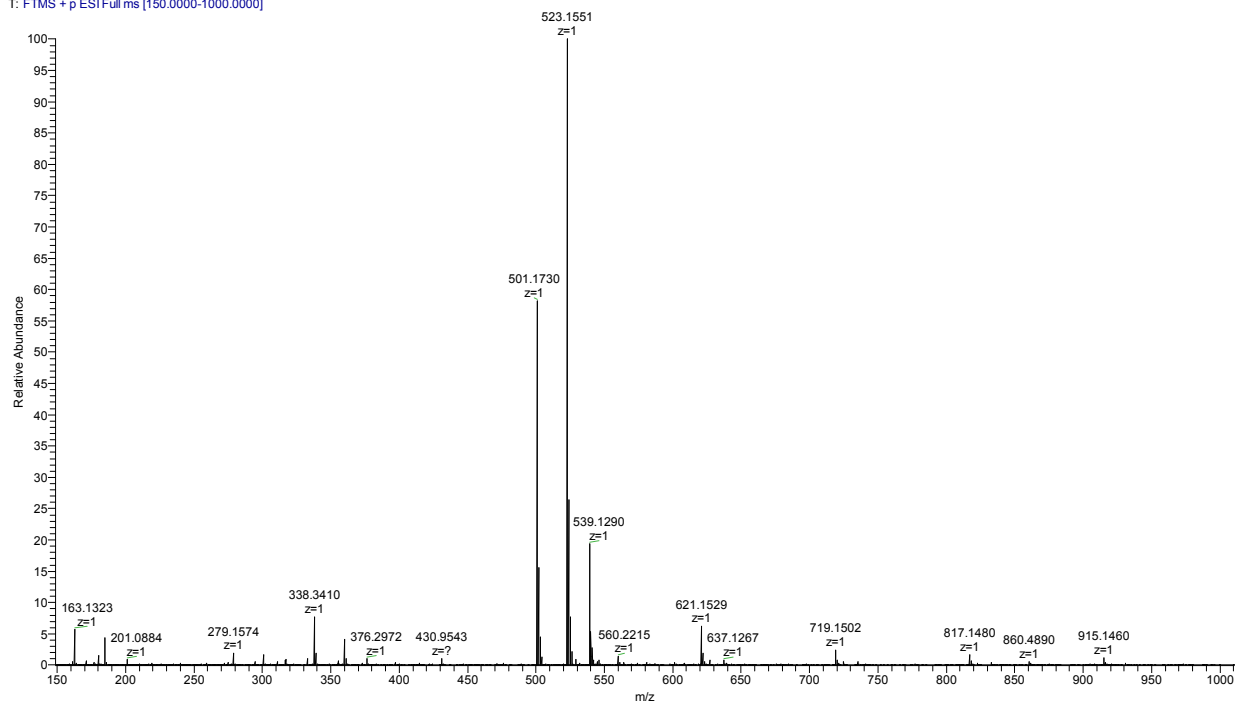

Figure S19: High-Resolution ESI-MS of Biotin-CBT.

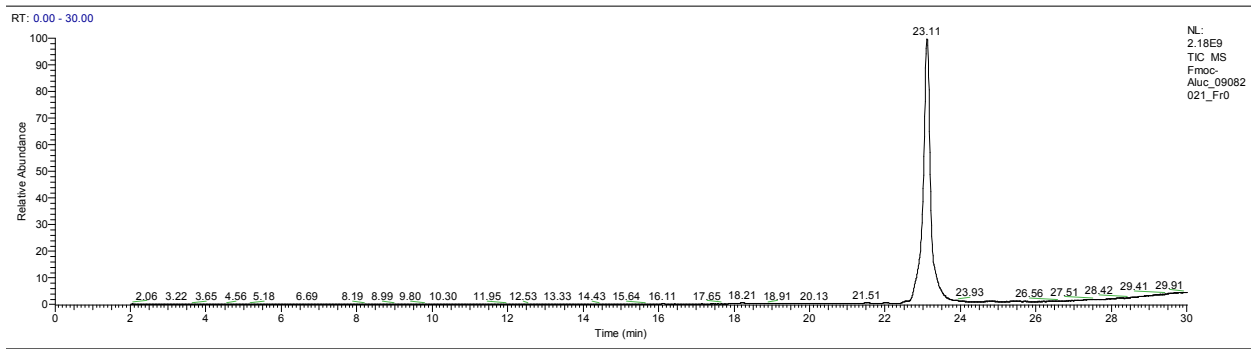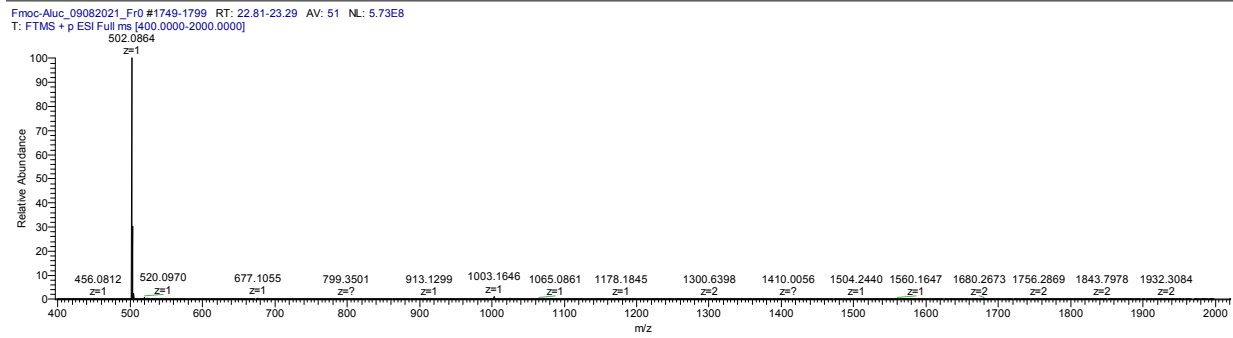

**Figure S20:** LC-MS data for Fmoc-Aluc. The TIC is shown on top and extracted data for the isolated peak on bottom.

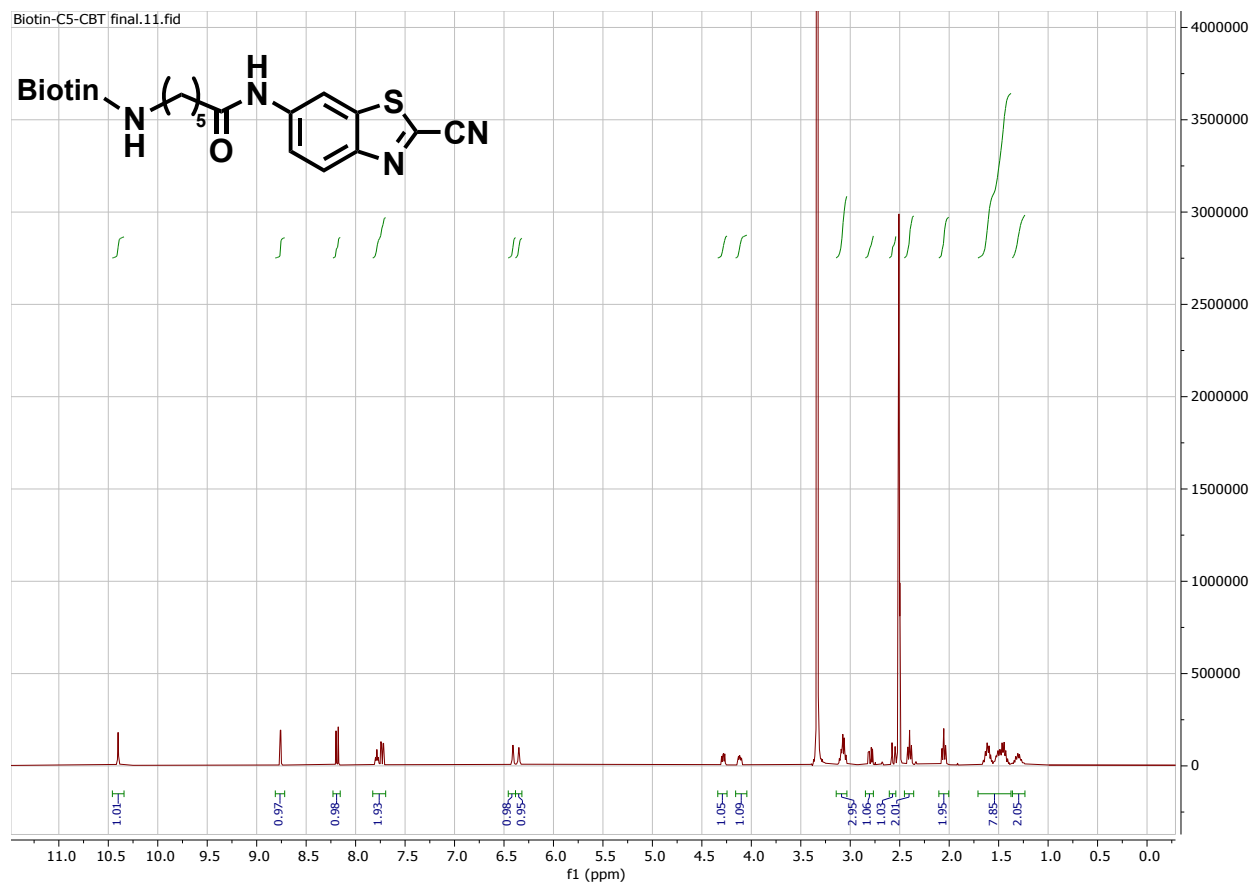

Figure S21:  $^1\text{H}$  NMR spectra for Biotin-CBT.

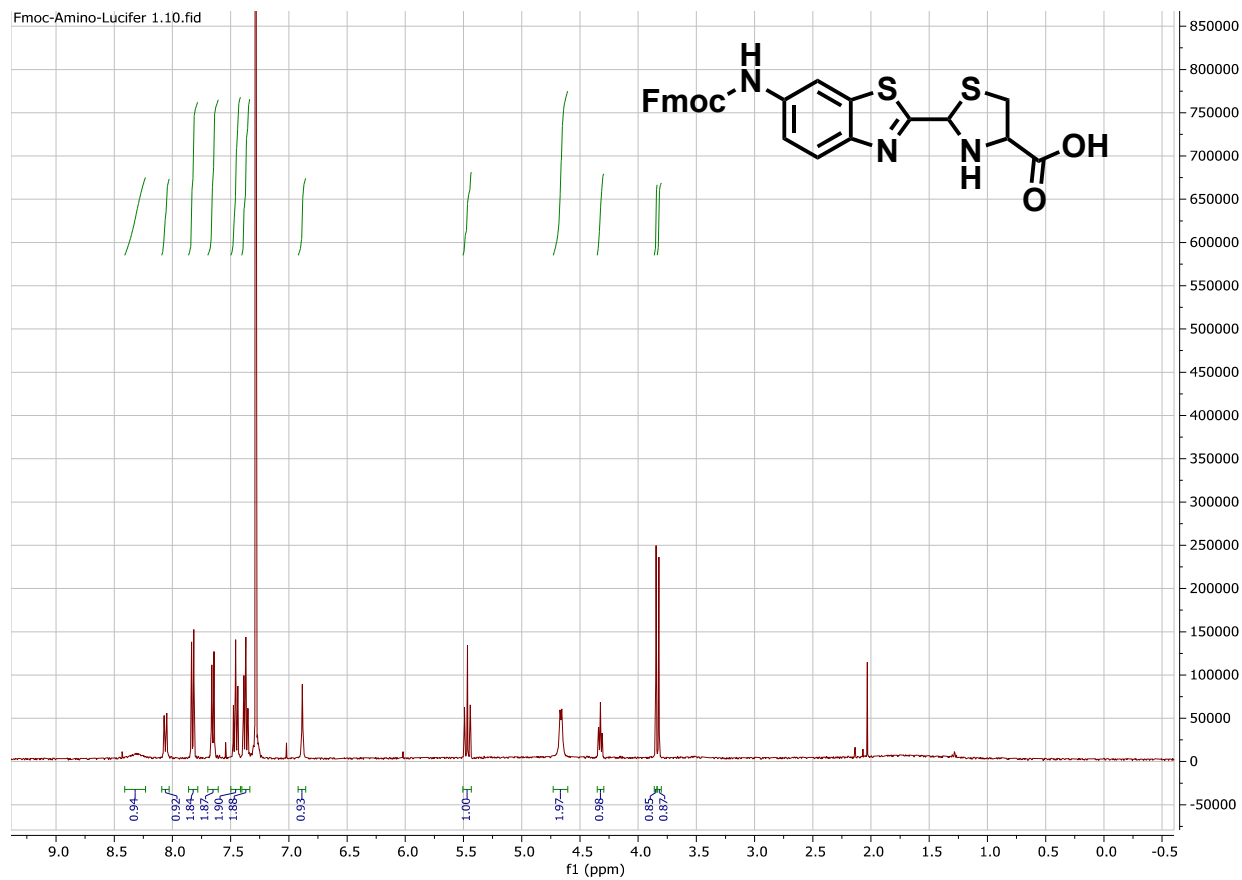

**SUPPLEMENTARY TABLES**

**Table S1:** High-Resolution Mass Spectrometry Data for Synthesized Peptides

| <b>Peptide</b> | <b>Sequence</b>            | <b>Expected Mass (Da)</b> | <b>Observed Mass (Da)</b> |
|----------------|----------------------------|---------------------------|---------------------------|
| P28            | Biotin-IYQAGSTPCNGVEGFNCYF | 2291.94                   | 2291.94                   |
| P29            | Biotin-CQPTNGVGYQC         | 1391.54                   | 1391.55                   |
| P28S1          | C*VPETELDTQSGPC*           | 1672.60                   | 1672.59                   |
| P28S2          | C*IPEQVLRADGSSC*           | 1671.66                   | 1671.67                   |
| P28S3          | C*VPSGADPQIASLC*           | 1554.61                   | 1554.61                   |
| P29S1          | C*VPESARSDDDGECC*          | 1676.53                   | 1676.54                   |
| P29S2          | C*VPETIIGNQGVPC*           | 1623.66                   | 1623.68                   |
| P29S3          | C*TFNGWGSRSRQAC*           | 1667.58                   | 1667.59                   |
| LinP29S1       | CVPESARSDDDGECC            | 1480.56                   | 1480.56                   |

C: Disulfide linked cysteines; C\*: CAmCBT linked cysteines



**Table S2:** Raw Plaque Counts for SARS-CoV-2 Cytopathic Effect Assay with P29S1

| <b>[P29S1] (<math>\mu</math>M)</b> | <b>Trial 1</b> |    |    | <b>Trial 2</b> |    |    | <b>Trial 3</b> |    |    |
|------------------------------------|----------------|----|----|----------------|----|----|----------------|----|----|
| 25                                 | 0              | 0  | 0  | 0              | 0  | 0  | 0              | 0  | 0  |
| 12.5                               | 12             | 14 | 7  | 0              | 0  | 0  | 0              | 0  | 0  |
| 6.25                               | 36             | 30 | 35 | 15             | 13 | 11 | 14             | 12 | 10 |
| 3.125                              | 49             | 58 | 51 | 41             | 43 | 38 | 43             | 40 | 41 |
| 1.5625                             | 63             | 68 | 66 | 66             | 60 | 58 | 63             | 59 | 61 |
| 0.78125                            | 82             | 80 | 89 | 73             | 71 | 74 | 76             | 70 | 70 |
| 0.390625                           |                |    |    | 85             | 86 | 94 | 83             | 90 | 87 |
| 0.195313                           |                |    |    | 92             | 90 | 87 | 89             | 90 | 84 |
| 0.097656                           |                |    |    | 96             | 97 | 92 | 96             | 93 | 91 |
| 0.048828                           |                |    |    | 94             | 97 | 96 | 94             | 94 | 92 |
|                                    |                |    |    |                |    |    |                |    |    |
| Blank                              | 83             | 91 | 86 | 99             | 94 | 93 | 91             | 97 | 97 |

**Table S3:** Raw Plaque Counts for SARS-CoV-2 Cytopathic Effect Assay with P28S1

| <b>[P28S1] (<math>\mu\text{M}</math>)</b> | <b>Trial 1</b> |    |    |
|-------------------------------------------|----------------|----|----|
| 25                                        | 87             | 79 | 84 |
| 12.5                                      | 86             | 88 | 81 |
| 6.25                                      | 81             | 94 | 86 |
| 3.125                                     | 90             | 87 | 85 |
| 1.5625                                    | 90             | 79 | 86 |
| 0.78125                                   | 88             | 78 | 93 |
|                                           |                |    |    |
| Blank                                     | 83             | 91 | 86 |

## SUPPLEMENTARY SCRIPTS

### Supplementary Script 1: Amino Acid Analysis

```
library(microseq)
library(RColorBrewer)
library(dplyr)
library(stringr)
library(gplots)
NNK7Ffilt <- readFastq("/Users/traehampton/Documents/Research/Sequencing Results/Next
  Gen Sequencing/22005Wns_N22008/22005Wns_ZNRF3-R1_S1_L001_R1_001.fastq")
NNK7Rfilt <- readFastq("/Users/traehampton/Documents/Research/Sequencing Results/Next
  Gen Sequencing/21510Wns_N21170/21510Wns_12mer-negneg_S4_L001_R2_001.fastq")
#Define the following variables
libraryseq <- "GCCCAG.{5}GCGGCG.{6}" #change this regex to match specific library
beginning <- 19 #beginning of library in DNA string
lib <- 14 #number of codons in the library region
end <- beginning+lib*3
initialcodon <- beginning%/%3*4-1
endcodon <- initialcodon + lib*4
del <- beginning%/%3 #number of codons before library
aa <- c("A","C","D","E","F","G","H","I","K","L","M","N","P","Q","R","S","T","V","W","Y","TAG")

#slices out matches that contain start followed by 24 bases to reverse primer
NNK7Ffilt21 <- gregexpr(libraryseq,NNK7Ffilt[,2],extract = TRUE)
NNK7Rrevcomp <- reverseComplement(NNK7Rfilt[,2],reverse = TRUE) #gives reverse
  complement of reverse reads
NNK7Rcompfilt21 <- gregexpr(libraryseq,NNK7Rrevcomp,extract = TRUE)

#this compares the forward and reverse strands, only allowing for one mismatch in the primers,
  no mismatches allowed in the library region
n <- length(NNK7Ffilt21)
NNK7Fgood <- vector()
for(i in c(1:n)){
  if(NNK7Ffilt21[[i]][1] == NNK7Rcompfilt21[[i]][1]){
    NNK7Fgood[i] <- NNK7Ffilt21[[i]][1]
```

```

}
else{
  split <- strsplit(c(NNK7Ffilt21[[i]][1],NNK7Rcompfilt21[[i]][1]), split = "")
  diff <- which(split[[1]] != split[[2]])
  if(length(diff) < 2 && length(diff) > 0){
    for(x in c(1:length(diff))){
      if(diff[[x]] < beginning || diff[[x]] > end){
        NNK7Fgood[i] <- NNK7Ffilt21[[i]][1]
      }
    }
  }
  else{
    NNK7Fgood[i] <- ""
  }
}
}
else{
  NNK7Fgood[i] <- ""
}
}
}
NNK7Fgood <- as.data.frame(NNK7Fgood)
NNK7Fgood <- NNK7Fgood[!apply(is.na(NNK7Fgood) | NNK7Fgood == "", 1, all),]

#this separates nucleotides into codons
codons <- gsub("(...)", "\\1 \\2", NNK7Ffilt21)

#this creates dataframe of sequences with reads organized by frequency
seqcount <- as.data.frame(sort(table(codons), decreasing = TRUE))

#this generates a matrix that contains amino acids in library region
l <- length(codons)
AAs <- matrix(0,l,lib)
AA <- gregexpr("\\s(TT[TC])",codons,useBytes = FALSE)
l <- length(AA)

```

```

for(a in c(1:l)){
  l2 <- length(AA[[a]])
  for(b in c(1:l2)){
    value <- AA[[a]][b]
    if(value > initialcodon && value < endcodon){
      AAs[a,(value%%4 - (del-1))] <- "F"
    }
  }
}

AA <- gregexpr("(\\sTT[AG])(\\sCT[GACT])",codons,useBytes = FALSE)
l <- length(AA)
for(a in c(1:l)){
  l2 <- length(AA[[a]])
  for(b in c(1:l2)){
    value <- AA[[a]][b]
    if(value > initialcodon && value < endcodon){
      AAs[a,(value%%4 - (del-1))] <- "L"
    }
  }
}

AA <- gregexpr("(\\sTC[GCAT])(\\sAG[TC])",codons,useBytes = FALSE)
l <- length(AA)
for(a in c(1:l)){
  l2 <- length(AA[[a]])
  for(b in c(1:l2)){
    value <- AA[[a]][b]
    if(value > initialcodon && value < endcodon){
      AAs[a,(value%%4 - (del-1))] <- "S"
    }
  }
}

AA <- gregexpr("\\sTA[TC]",codons,useBytes = FALSE)
l <- length(AA)

```

```

for(a in c(1:l)){
  l2 <- length(AA[[a]])
  for(b in c(1:l2)){
    value <- AA[[a]][b]
    if(value > initialcodon && value < endcodon){
      AAs[a,(value%%4 - (del-1))] <- "Y"
    }
  }
}
AA <- gregexpr("\\sTAG",codons,useBytes = FALSE)
l <- length(AA)
for(a in c(1:l)){
  l2 <- length(AA[[a]])
  for(b in c(1:l2)){
    value <- AA[[a]][b]
    if(value > initialcodon && value < endcodon){
      AAs[a,(value%%4 - (del-1))] <- "TAG"
    }
  }
}
AA <- gregexpr("\\sTAA",codons,useBytes = FALSE)
l <- length(AA)
for(a in c(1:l)){
  l2 <- length(AA[[a]])
  for(b in c(1:l2)){
    value <- AA[[a]][b]
    if(value > initialcodon && value < endcodon){
      AAs[a,(value%%4 - (del-1))] <- NA
    }
  }
}
AA <- gregexpr("\\sTG[TC]",codons,useBytes = FALSE)
l <- length(AA)

```

```

for(a in c(1:l)){
  l2 <- length(AA[[a]])
  for(b in c(1:l2)){
    value <- AA[[a]][b]
    if(value > initialcodon && value < endcodon){
      AAs[a,(value%%4 - (del-1))] <- "C"
    }
  }
}
AA <- gregexpr("\\sTGA",codons,useBytes = FALSE)
l <- length(AA)
for(a in c(1:l)){
  l2 <- length(AA[[a]])
  for(b in c(1:l2)){
    value <- AA[[a]][b]
    if(value > initialcodon && value < endcodon){
      AAs[a,(value%%4 - (del-1))] <- NA
    }
  }
}
AA <- gregexpr("\\sTGG",codons,useBytes = FALSE)
l <- length(AA)
for(a in c(1:l)){
  l2 <- length(AA[[a]])
  for(b in c(1:l2)){
    value <- AA[[a]][b]
    if(value > initialcodon && value < endcodon){
      AAs[a,(value%%4 - (del-1))] <- "W"
    }
  }
}
AA <- gregexpr("\\sCC[GCAT]",codons,useBytes = FALSE)
l <- length(AA)

```

```

for(a in c(1:l)){
  l2 <- length(AA[[a]])
  for(b in c(1:l2)){
    value <- AA[[a]][b]
    if(value > initialcodon && value < endcodon){
      AAs[a,(value%%4 - (del-1))] <- "P"
    }
  }
}
AA <- gregexpr("\\sCA[CT]",codons,useBytes = FALSE)
l <- length(AA)
for(a in c(1:l)){
  l2 <- length(AA[[a]])
  for(b in c(1:l2)){
    value <- AA[[a]][b]
    if(value > initialcodon && value < endcodon){
      AAs[a,(value%%4 - (del-1))] <- "H"
    }
  }
}
AA <- gregexpr("\\sCA[AG]",codons,useBytes = FALSE)
l <- length(AA)
for(a in c(1:l)){
  l2 <- length(AA[[a]])
  for(b in c(1:l2)){
    value <- AA[[a]][b]
    if(value > initialcodon && value < endcodon){
      AAs[a,(value%%4 - (del-1))] <- "Q"
    }
  }
}
AA <- gregexpr("(\\sCG[GCAT])(\\sAG[GA])",codons,useBytes = FALSE)
l <- length(AA)

```



```

for(a in c(1:l)){
  l2 <- length(AA[[a]])
  for(b in c(1:l2)){
    value <- AA[[a]][b]
    if(value > initialcodon && value < endcodon){
      AAs[a,(value%%4 - (del-1))] <- "R"
    }
  }
}
AA <- gregexpr("\\sAT[CAT]",codons,useBytes = FALSE)
l <- length(AA)
for(a in c(1:l)){
  l2 <- length(AA[[a]])
  for(b in c(1:l2)){
    value <- AA[[a]][b]
    if(value > initialcodon && value < endcodon){
      AAs[a,(value%%4 - (del-1))] <- "I"
    }
  }
}
AA <- gregexpr("\\sATG",codons,useBytes = FALSE)
l <- length(AA)
for(a in c(1:l)){
  l2 <- length(AA[[a]])
  for(b in c(1:l2)){
    value <- AA[[a]][b]
    if(value > initialcodon && value < endcodon){
      AAs[a,(value%%4 - (del-1))] <- "M"
    }
  }
}
AA <- gregexpr("\\sAC[GCAT]",codons,useBytes = FALSE)
l <- length(AA)

```

```

for(a in c(1:l)){
  l2 <- length(AA[[a]])
  for(b in c(1:l2)){
    value <- AA[[a]][b]
    if(value > initialcodon && value < endcodon){
      AAs[a,(value%%4 - (del-1))] <- "T"
    }
  }
}
AA <- gregexpr("\sAA[CT]",codons,useBytes = FALSE)
l <- length(AA)
for(a in c(1:l)){
  l2 <- length(AA[[a]])
  for(b in c(1:l2)){
    value <- AA[[a]][b]
    if(value > initialcodon && value < endcodon){
      AAs[a,(value%%4 - (del-1))] <- "N"
    }
  }
}
AA <- gregexpr("\sAA[AG]",codons,useBytes = FALSE)
l <- length(AA)
for(a in c(1:l)){
  l2 <- length(AA[[a]])
  for(b in c(1:l2)){
    value <- AA[[a]][b]
    if(value > initialcodon && value < endcodon){
      AAs[a,(value%%4 - (del-1))] <- "K"
    }
  }
}
AA <- gregexpr("\sGT[GACT]",codons,useBytes = FALSE)
l <- length(AA)

```

```

for(a in c(1:l)){
  l2 <- length(AA[[a]])
  for(b in c(1:l2)){
    value <- AA[[a]][b]
    if(value > initialcodon && value < endcodon){
      AAs[a,(value%%4 - (del-1))] <- "V"
    }
  }
}

AA <- gregexpr("\\sGC[GACT]",codons,useBytes = FALSE)
l <- length(AA)
for(a in c(1:l)){
  l2 <- length(AA[[a]])
  for(b in c(1:l2)){
    value <- AA[[a]][b]
    if(value > initialcodon && value < endcodon){
      AAs[a,(value%%4 - (del-1))] <- "A"
    }
  }
}

AA <- gregexpr("\\sGA[TC]",codons,useBytes = FALSE)
l <- length(AA)
for(a in c(1:l)){
  l2 <- length(AA[[a]])
  for(b in c(1:l2)){
    value <- AA[[a]][b]
    if(value > initialcodon && value < endcodon){
      AAs[a,(value%%4 - (del-1))] <- "D"
    }
  }
}

AA <- gregexpr("\\sGA[AG]",codons,useBytes = FALSE)
l <- length(AA)

```

```

for(a in c(1:l)){
  l2 <- length(AA[[a]])
  for(b in c(1:l2)){
    value <- AA[[a]][b]
    if(value > initialcodon && value < endcodon){
      AAs[a,(value%%4 - (del-1))] <- "E"
    }
  }
}
AA <- gregexpr("\\sGG[GACT]",codons,useBytes = FALSE)
l <- length(AA)
for(a in c(1:l)){
  l2 <- length(AA[[a]])
  for(b in c(1:l2)){
    value <- AA[[a]][b]
    if(value > initialcodon && value < endcodon){
      AAs[a,(value%%4 - (del-1))] <- "G"
    }
  }
}
AAs <- as.data.frame(AAs)
#this gives unique amino acid sequences
UniqueAAs <- AAs %>% group_by_all() %>% count()
UniqueAAs <- UniqueAAs[order(-UniqueAAs$n),]
UniqueAAs <- UniqueAAs[apply(UniqueAAs,1,function(row) all(row != 0)),]
UniqueAAs <- na.omit(UniqueAAs)

#this counts sequences that have TAG codons, sequences that have more than one are only
counted once
TAGreg <- regexpr("\\sTAG",codons)
TAGtable <- table(TAGreg)
percentTAG <- sum(TAGtable[2:length(TAGtable)])/length(codons)*100#percent of sequences
containing TAG

```

```

#this creates a matrix of amino acid sequences that do not contain TAG codons
TAGpos <- which(AAs == "TAG")
TAGrow <- TAGpos%%nrow(AAs)
AAsnoTAG <- AAs[-TAGrow,]

#this creates heatmap for amino acid frequency per library position, change scale according to
values
AAtable <- apply(AAs,2,function(x) table(factor(x,levels=aa)))
AAtable <- as.matrix(AAtable/length(codons))
colnames(AAtable) <- c(1:lib)
heatmapcolors <- colorRampPalette(brewer.pal(9,"Blues"))(100)
sc <- seq(0.0,0.6,by=0.006)
AAheatmap <- heatmap.2(AAtable, Rowv = NA, Colv = NA, col = heatmapcolors, density.info =
"none", scale = "none", trace = "none", breaks = sc, xlab = "Position in Library", ylab =
"Codon", margins = c(3,4), dendrogram = "none")

#this creates projected heatmap based on NNK randomized codons
randomAAs <- matrix(0,21,lib,dimnames = list(rownames(AAtable),c(1:lib)))
randomAAs[c("A","G","P","T","V"),] <- 2/32
randomAAs[c("C","H","Q","N","K","Y","D","E","W","I","M","TAG","F"),] <- 1/32
randomAAs[c("L","S","R"),] <- 3/32
NNKheatmap <- heatmap.2(randomAAs, Rowv = NA, Colv = NA, col = heatmapcolors,
density.info = "none", scale = "none", trace = "none", breaks = sc, xlab = "Position in Library",
ylab = "Codon", margins = c(3,4), dendrogram = "none")

#this creates heatmap showing bias from random, change scale with respect to range of values
lscale <- seq(-1,4,by=5/100)
librarybias <- (AAtable - randomAAs)/randomAAs
Biasheatmap <- heatmap.2(librarybias, Rowv = NA, Colv = NA, col = heatmapcolors,
density.info = "none", scale = "none", trace = "none", breaks = lscale, xlab = "Position in
Library", ylab = "Codon", margins = c(3,4), dendrogram = "none")
librarybias <- as.data.frame(librarybias)

```

```

#this creates heatmap for AAsnoTAG
AAnoTAGtable <- apply(AAsnoTAG,2,function(x) table(factor(x,levels=aa)))
AAnoTAGtable <- as.matrix(AAnoTAGtable/nrow(AAsnoTAG))
colnames(AAnoTAGtable) <- c(1:lib)
heatmapcolors <- colorRampPalette(brewer.pal(9,"Blues"))(100)
sc <- seq(0.0,0.3,by=0.003)
AAheatmap <- heatmap.2(AAnoTAGtable, Rowv = NA, Colv = NA, col = heatmapcolors,
  density.info = "none", scale = "none", trace = "none", breaks = sc, xlab = "Position in Library",
  ylab = "Codon", margins = c(3,4), dendrogram = "none")

```

```

#writes csv files for uniqueAAs and bias heatmaps change path to make file
path <- "/Users/traehampton/Documents/Research/Sequencing Results/Next Gen
  Sequencing/21510Wns_N21170"
write.csv(UniqueAAs, paste(path,"/12mernegnegUniqueAAs.csv", sep = ""), row.names = F)
write.csv(TAGtable, paste(path,"/12mernegnegTAGtable.csv", sep = ""), row.names = T)
write.csv(librarybias, paste(path,"/12mernegnegLibraryBias.csv", sep = ""), row.names = T)

```

### Supplementary Script 2: Enrichment of Peptides

```

#this gives overall enrichment of each peptide sequence by comparing Round 1 and Round 4

```

```

Library
library(proclim)
path <- "/Users/traehampton/Documents/Research/Sequencing Results/Next Gen
  Sequencing/21510Wns_N21170"
lib <- 7
match <- row.match(UniqueAAsR1[,1:lib],UniqueAAsR3[,1:lib])
matchseq <- which(is.na(match)==FALSE)
percentenriched <- (UniqueAAsR3[match[matchseq],lib+1]/sum(UniqueAAsR3[,lib+1])-
  UniqueAAsR1[matchseq,lib+1]/sum(UniqueAAsR1$n))/(UniqueAAsR1[matchseq,lib+1]/sum(Un
  iqueAAsR1$n))
enrichedseq <- UniqueAAsR3[match[matchseq],]
enrichedseq$enrichment <- percentenriched[,1]
enrichedseq <- enrichedseq[order(-enrichedseq$enrichment),]
enrichedseq <- as.data.frame(enrichedseq)

```

```
UniqueAAsR1$percent <- UniqueAAsR1$n/sum(UniqueAAsR1$n)*100
```

```
UniqueAAsR3$percent <- UniqueAAsR3$n/sum(UniqueAAsR3$n)*100
```
